# Supplementary material for: Assessing the Association of Pioglitazone Use and Bladder Cancer Through Drug Adverse Event Reporting
Source: PubMed Central journal article supplement — Diabetes Care. 2011 May 20;34(6):1369–71. doi: 10.2337/dc10-2412 (PMC3114317; doi:10.2337/dc10-2412), 2011-05-20
Supplement: supp_dc10-2412v102412_DC102412SupplementaryData.pdf [file supp_dc10-2412v102412_DC102412SupplementaryData.pdf]

SUPPLEMENTARY DATA

**Supplementary Table 1. Case listing of bladder cancer related to pioglitazone therapy**

| CASE    | Event year | From clinical study | Age | Gender | Therapy duration (days) | Concomitant Drugs                                                                                                                                                                                     | Co-morbidity          |
|---------|------------|---------------------|-----|--------|-------------------------|-------------------------------------------------------------------------------------------------------------------------------------------------------------------------------------------------------|-----------------------|
| 4172635 | 2004       | No                  | 88  | M      | n.a.                    | gliclazide<br>acarbose<br>ezetimibe<br>metformin<br>ramipril<br>atorvastatin                                                                                                                          |                       |
| 4125536 | 2004       | Yes                 | 73  | M      | 337                     | lansoprazole                                                                                                                                                                                          |                       |
| 5653392 | 2004       | Yes                 | 53  | M      | n.a.                    | isepamicin<br>bezafibrate<br>famotidine<br>ketoprofen<br>ofloxacin<br>sildenafil<br>sulpiride<br>valsartan<br>ethyl icosapentate                                                                      |                       |
| 5731398 | 2004       | Yes                 | 75  | M      | n.a.                    | dextromethorphan<br>tranexamic acid<br>telmisartan<br>salicylamide<br>promethazine<br>glimepiride<br>metformin<br>cloperastine<br>amoxicillin<br>cefdinir<br>carbocisteine<br>paracetamol<br>caffeine |                       |
| 6462605 | 2005       | No                  | 67  | M      | n.a.                    | methotrexate<br>tamsulosin<br>sitagliptin<br>simvastatin                                                                                                                                              | psoriatic arthropathy |

SUPPLEMENTARY DATA

| <b>CASE</b> | <b>Event year</b> | <b>From clinical study</b> | <b>Age</b> | <b>Gender</b> | <b>Therapy duration (days)</b> | <b>Concomitant Drugs</b>                                                                                                                                                     | <b>Co-morbidity</b> |
|-------------|-------------------|----------------------------|------------|---------------|--------------------------------|------------------------------------------------------------------------------------------------------------------------------------------------------------------------------|---------------------|
|             |                   |                            |            |               |                                | ramipril<br>metformin<br>infliximab<br>folic acid<br>escitalopram<br>ranitidine                                                                                              |                     |
| 5960713     | 2005              | No                         | 54         | M             | 63                             | lisinopril<br>simvastatin<br>gemfibrozil<br>clopidogrel                                                                                                                      |                     |
| 5996136     | 2005              | Yes                        | 69         | M             | 418                            | atenolol<br>acetylsalicylic acid                                                                                                                                             |                     |
| 6280536     | 2006              | No                         | 56         | F             | n.a.                           | oxybutynin<br>interferon beta-1a                                                                                                                                             | multiple sclerosis  |
| 6209285     | 2006              | No                         | 81         | F             | n.a.                           | atorvastatin<br>celecoxib<br>fluticasone<br>gabapentin<br>levothyroxine<br>sodium<br>lisinopril<br>metformin<br>multivitamins<br>risedronic acid<br>salbutamol<br>salmeterol |                     |
| 6144746     | 2006              | No                         | 62         | F             | n.a.                           | salmeterol<br>ipratropium<br>bromide<br>lisinopril<br>potassium<br>insulin glargine<br>vitamins<br>duloxetine                                                                |                     |

SUPPLEMENTARY DATA

| CASE    | Event year | From clinical study | Age | Gender | Therapy duration (days) | Concomitant Drugs                                                                                                                                                         | Co-morbidity             |
|---------|------------|---------------------|-----|--------|-------------------------|---------------------------------------------------------------------------------------------------------------------------------------------------------------------------|--------------------------|
|         |            |                     |     |        |                         | salbutamol<br>glimepiride<br>fluticasone<br>esomeprazole<br>cetirizine<br>calcium gluconate<br>calcium gluceptate<br>acarbose<br>exenatide<br>spironolactone<br>valsartan |                          |
| 6093650 | 2006       | Yes                 | 66  | M      | 796                     | gemfibrozil<br>metoprolol<br>simvastatin<br>vitamins nos                                                                                                                  |                          |
| 6136429 | 2006       | No                  | 76  | M      | 153                     | acetylsalicylic acid<br>glimepiride                                                                                                                                       |                          |
| 6833097 | 2006       | No                  | 73  | M      | n.a.                    | acetylsalicylic acid<br>atenolol<br>enalapril                                                                                                                             |                          |
| 6061282 | 2006       | Yes                 | 84  | M      | 172                     | atorvastatin<br>brinzolamide<br>latanoprost<br>levofloxacin<br>timolol                                                                                                    |                          |
| 6070139 | 2006       | Yes                 | 74  | M      | n.a.                    | triazolam<br>acetylsalicylic acid<br>nateglinide<br>telmisartan                                                                                                           |                          |
| 6139667 | 2006       | No                  | 79  | M      | 69                      | simvastatin<br>tolterodine<br>tamsulosin<br>paracetamol                                                                                                                   | renal failure<br>chronic |

SUPPLEMENTARY DATA

| CASE    | Event year | From clinical study | Age | Gender | Therapy duration (days) | Concomitant Drugs                                                                                                                                                          | Co-morbidity               |
|---------|------------|---------------------|-----|--------|-------------------------|----------------------------------------------------------------------------------------------------------------------------------------------------------------------------|----------------------------|
|         |            |                     |     |        |                         | nicotinic acid<br>mometasone<br>hyoscyamine<br>furosemide<br>esomeprazole<br>darbepoetin alfa<br>clopidogrel<br>amlodipine<br>thiamine<br>metoprolol                       |                            |
| 6367838 | 2007       | No                  | 73  | M      | n.a.                    |                                                                                                                                                                            |                            |
| 6288824 | 2007       | No                  | 71  | M      | n.a.                    | paracetamol<br>bupropion<br>cyanocobalamin<br>darbepoetin alfa<br>dexamethasone<br>enalapril<br>folic acid<br>loratadine<br>tamsulosin<br>prochlorperazine<br>atorvastatin | non-small cell lung cancer |
| 6654052 | 2007       | No                  | 68  | M      | 1215                    | omega-3<br>glipizide<br>furosemide<br>fluticasone<br>clopidogrel<br>tiotropium bromide                                                                                     |                            |
| 6354279 | 2007       | Yes                 | 71  | M      | 126                     | clopidogrel<br>pantoprazole                                                                                                                                                |                            |
| 6517839 | 2007       | No                  | 69  | F      | 318                     | atenolol<br>atorvastatin<br>acarbose<br>glimepiride                                                                                                                        |                            |

SUPPLEMENTARY DATA

| <b>CASE</b> | <b>Event year</b> | <b>From clinical study</b> | <b>Age</b> | <b>Gender</b> | <b>Therapy duration (days)</b> | <b>Concomitant Drugs</b>                                                                       | <b>Co-morbidity</b> |
|-------------|-------------------|----------------------------|------------|---------------|--------------------------------|------------------------------------------------------------------------------------------------|---------------------|
| 6579398     | 2008              | No                         | 70         | M             | 2361                           | verapamil<br>lisinopril<br>hydrochlorothiazide<br>doxazosin<br>atorvastatin                    |                     |
| 6892641     | 2008              | No                         | 74         | F             | 762                            |                                                                                                |                     |
| 6913281     | 2008              | Yes                        | 71         | M             | n.a.                           |                                                                                                |                     |
| 6950249     | 2008              | No                         | 77         | M             | 92                             | furosemide<br>atenolol<br>glimepiride<br>simvastatin<br>acetylsalicylic acid<br>spironolactone |                     |
| 7131298     | 2008              | No                         | 53         | F             | 277                            | escitalopram<br>glimepiride<br>lisinopril<br>metformin<br>verapamil<br>alprazolam              |                     |
| 6796353     | 2008              | No                         | 80         | F             | n.a.                           | glibenclamide<br>risedronic acid                                                               |                     |
| 7128421     | 2009              | Yes                        | 73         | M             | n.a.                           |                                                                                                |                     |
| 7015483     | 2009              | No                         | 66         | M             | 414                            | lisinopril<br>metoprolol<br>amlodipine<br>acetylsalicylic acid                                 |                     |
| 7017054     | 2009              | No                         | 75         | M             | n.a.                           | olmesartan<br>medoxomil<br>carvedilol                                                          |                     |
| 7025092     | 2009              | No                         | 60         | F             | n.a.                           | exenatide                                                                                      |                     |

SUPPLEMENTARY DATA

| <b>CASE</b> | <b>Event year</b> | <b>From clinical study</b> | <b>Age</b> | <b>Gender</b> | <b>Therapy duration (days)</b> | <b>Concomitant Drugs</b> | <b>Co-morbidity</b> |
|-------------|-------------------|----------------------------|------------|---------------|--------------------------------|--------------------------|---------------------|
|             |                   |                            |            |               |                                | metformin                |                     |

SUPPLEMENTARY DATA

**Supplementary Table 2.** Stratified analysis for age, gender and event year of ROR for pioglitazone-related bladder cancer

|                   | pioglitazone |         |      |            |                 |
|-------------------|--------------|---------|------|------------|-----------------|
|                   | Cases*       | All ADR | ROR  | 95%CI      | p <sub>MH</sub> |
| <b>Gender</b>     |              |         |      |            |                 |
| M                 | 23           | 16,867  | 3.86 | 2.37-6.26  | <0.001          |
| F                 | 8            | 20,974  | 5.19 | 2.15-12.11 | <0.001          |
| <b>Age</b>        |              |         |      |            |                 |
| 65 yr             | 6            | 22,738  | 2.42 | 0.92-5.98  | 0.038           |
| > 65 yr           | 25           | 15,103  | 5.10 | 3.14-8.23  | <0.001          |
| <b>Event year</b> |              |         |      |            |                 |
| 2004              | 4            | 4,221   | 4.77 | 1.30-15.88 | 0.003           |
| 2005              | 3            | 7,581   | 3.73 | 0.83-14.35 | 0.030           |
| 2006              | 9            | 10,415  | 5.24 | 2.29-11.64 | <0.001          |
| 2007              | 5            | 8,165   | 3.85 | 1.26-10.90 | 0.004           |
| 2008              | 6            | 4,813   | 5.23 | 1.85-14.07 | <0.001          |
| 2009              | 4            | 2646    | 3.10 | 0.90-9.53  | 0.029           |

\*Cases of bladder cancer
